# Supplementary material
Source: HighWire-hosted journal article supplement (https://www.endocrinology-journals.org/content/suppl/2017/08/07/ERC-16-0479)
Supplement: supplementary_table_1.pdf [file supplementary_table_1.pdf]

joe-sub


 


- Home
- Archives

  - Phytogenes

    - Ashwagandha
    - DAA
    - Ginger and Testosterone
    - Damiana and Testosterone
    - Nettle Leaf and Testosterone
    - Testosterone and Avocado
  - Endocrinology

    - joe-sub
    - erc-sub
    - jme-sub
- Hormones

  - Testosterone

    - What Is Testosterone
    - Best Testosterone Booster
    - Are Testosterone Boosters Safe?
    - Do Testosterone Boosters Raise Libido?
    - Symptoms of Low Testosterone
    - What Is SHBG?
    - Vitamin D and Testosterone
    - Selenium and Testosterone
    - Zinc and Testosterone
    - Testosterone vs Estrogen
    - Testosterone and Magnesium
    - Foods That Kill Testosterone
    - Which Nuts Boost Testosterone
    - Testosterone and Stress
    - Testosterone and Exercise
    - Testosterone and Height
    - Testosterone and Alcohol
    - Testosterone and Hair Loss
    - Testosterone and Masturbation
    - Testosterone and Meat
    - Testosterone and Coffee
    - Testosterone and Gynecomastia
    - Damiana and Testosterone
    - Testosterone and Nettle Leaf
    - Testosterone and Oat Straw
    - Testosterone and DHEA
  - Ghrelin

    - What Is Ghrelin
    - Best Metabolism Booster
    - Vitamin D and Ghrelin
  - Cortisol

    - What is Cortisol
  - Melatonin

    - What Is Melatonin
    - Best Melatonin Supplements
    - Melatonin and Jet Lag
    - Is Melatonin Safe
  - Estrogen

    - What is Estrogen
    - What Is Menopause
    - Estrogen vs Testosterone
  - Leptin
  - Insulin

    - Supplements to Lower A1c
- Reviews

  - Testosterone Boosters

    - TestoFuel Review
    - TestoGen Review
    - Nugenix Ultimate Review
    - Prime Male Review
    - TestoPrime Review
    - Roman Testosterone Support Review
    - T Hero Review
    - TestoUltra Review
    - Testo Lab Pro Reviews
    - Six Star Testosterone Booster
    - high t black reviews
    - Test Boost Max Review
    - Cellucor P6 Ultimate Reviews
    - Prime Test Review
  - Best Products

    - Best Metabolism Booster
    - Best Testosterone Booster
    - Best Melatonin Supplements
    - RestAgain Review
  - Other Products

    - RediMove Review
    - Relief Factor Review
    - Heal n Soothe Review
    - Instaflex Review
    - MoveMD Revview
    - Heart Beets Review
    - Umzu Redwood Review
    - Meno Review
  - Weight Loss Aids

    - Instant Knockout Review
    - Slimvance XP Reviews
    - Hourglass Fit Review
    - Phena-Lean Reviews
    - Fast Lean Pro Reviews
  - Comparisons

    - Testoprime vs Prime Male
    - Testogen vs Prime Male
    - Nugenix vs Ageless Male Max
    - Testogen vs Testofuel
    - Meno Vs Provitalize
    - GlucoTrust vs GlucoFort
    - Ryze vs MUDWTR
- Contact

  - Feedback
  - Submit Article

- Home
- Archives

  - Phytogenes

    - Ashwagandha
    - DAA
    - Ginger and Testosterone
    - Damiana and Testosterone
    - Nettle Leaf and Testosterone
    - Testosterone and Avocado
  - Endocrinology

    - joe-sub
    - erc-sub
    - jme-sub
- Hormones

  - Testosterone

    - What Is Testosterone
    - Best Testosterone Booster
    - Are Testosterone Boosters Safe?
    - Do Testosterone Boosters Raise Libido?
    - Symptoms of Low Testosterone
    - What Is SHBG?
    - Vitamin D and Testosterone
    - Selenium and Testosterone
    - Zinc and Testosterone
    - Testosterone vs Estrogen
    - Testosterone and Magnesium
    - Foods That Kill Testosterone
    - Which Nuts Boost Testosterone
    - Testosterone and Stress
    - Testosterone and Exercise
    - Testosterone and Height
    - Testosterone and Alcohol
    - Testosterone and Hair Loss
    - Testosterone and Masturbation
    - Testosterone and Meat
    - Testosterone and Coffee
    - Testosterone and Gynecomastia
    - Damiana and Testosterone
    - Testosterone and Nettle Leaf
    - Testosterone and Oat Straw
    - Testosterone and DHEA
  - Ghrelin

    - What Is Ghrelin
    - Best Metabolism Booster
    - Vitamin D and Ghrelin
  - Cortisol

    - What is Cortisol
  - Melatonin

    - What Is Melatonin
    - Best Melatonin Supplements
    - Melatonin and Jet Lag
    - Is Melatonin Safe
  - Estrogen

    - What is Estrogen
    - What Is Menopause
    - Estrogen vs Testosterone
  - Leptin
  - Insulin

    - Supplements to Lower A1c
- Reviews

  - Testosterone Boosters

    - TestoFuel Review
    - TestoGen Review
    - Nugenix Ultimate Review
    - Prime Male Review
    - TestoPrime Review
    - Roman Testosterone Support Review
    - T Hero Review
    - TestoUltra Review
    - Testo Lab Pro Reviews
    - Six Star Testosterone Booster
    - high t black reviews
    - Test Boost Max Review
    - Cellucor P6 Ultimate Reviews
    - Prime Test Review
  - Best Products

    - Best Metabolism Booster
    - Best Testosterone Booster
    - Best Melatonin Supplements
    - RestAgain Review
  - Other Products

    - RediMove Review
    - Relief Factor Review
    - Heal n Soothe Review
    - Instaflex Review
    - MoveMD Revview
    - Heart Beets Review
    - Umzu Redwood Review
    - Meno Review
  - Weight Loss Aids

    - Instant Knockout Review
    - Slimvance XP Reviews
    - Hourglass Fit Review
    - Phena-Lean Reviews
    - Fast Lean Pro Reviews
  - Comparisons

    - Testoprime vs Prime Male
    - Testogen vs Prime Male
    - Nugenix vs Ageless Male Max
    - Testogen vs Testofuel
    - Meno Vs Provitalize
    - GlucoTrust vs GlucoFort
    - Ryze vs MUDWTR
- Contact

  - Feedback
  - Submit Article

# Endocrinology Journals

Welcome to American Endocrinology Journals  
  
To read the latest articles pier reviewed articles on endorcrinology please login.

Our publication features the latest research and breakthroughs in the field of endocrinology, covering topics such as hormone signaling, gene expression, and molecular mechanisms of endocrine disorders. With a team of renowned experts as our editors, we guarantee that our content is of the highest quality and relevance.

Endocrinology is a fascinating field of medicine that focuses on the study of hormones and their impact on various bodily functions. Hormones play a crucial role in regulating essential processes such as metabolism, growth, sexual development, and reproduction. The study of endocrinology helps us understand how these chemical messengers, secreted by endocrine glands and organs, influence our overall health and well-being.

The Endocrine System: An Intricate Network

The endocrine system is a complex network of glands and organs that work together to produce and release hormones into the bloodstream. These hormones then travel to specific target cells or organs, where they initiate a response and regulate various physiological activities. Some of the key glands and organs in the endocrine system include:

1. Pituitary Gland: Often referred to as the "master gland," the pituitary gland produces and releases hormones that control the function of other endocrine glands.
2. Thyroid Gland: The thyroid gland produces hormones that regulate metabolism, energy levels, and growth.
3. Adrenal Glands: The adrenal glands secrete hormones that help the body cope with stress, regulate blood pressure, and control the body's salt and water balance.
4. Pancreas: The pancreas plays a dual role as both a digestive organ and an endocrine gland. It produces insulin, which regulates blood sugar levels, among other hormones.
5. Ovaries: In females, the ovaries produce hormones such as estrogen and progesterone, which are vital for sexual development and reproductive health.
6. Testes: In males, the testes produce testosterone, which is responsible for male sexual development and fertility.
7. Other Glands and Organs: The endocrine system also includes the pineal gland, parathyroid glands, hypothalamus, and various other organs that contribute to hormone production and regulation.

The Importance of Hormones in the Body

Hormones act as chemical messengers that facilitate communication between different parts of the body. They play a crucial role in maintaining homeostasis, coordinating growth and development, regulating metabolism, and influencing mood and behavior. Here are some key functions and processes that hormones are involved in:

1. Metabolism: Hormones such as insulin, produced by the pancreas, regulate the metabolism of glucose and other nutrients in the body.
2. Growth and Development: Growth hormones, secreted by the pituitary gland, play a vital role in stimulating growth and development during childhood and adolescence.
3. Sexual Development and Reproduction: Hormones like estrogen and testosterone are responsible for sexual development and reproductive functions.
4. Mood and Behavior: Hormones can influence mood, stress levels, and behavioral patterns.
5. Blood Pressure and Heart Rate: Certain hormones help regulate blood pressure and heart rate, ensuring proper cardiovascular function.
6. Bone Health: Hormones like estrogen and parathyroid hormone are critical for maintaining healthy bones and preventing conditions such as osteoporosis.
7. Sleep Regulation: The pineal gland secretes melatonin, a hormone that helps regulate sleep-wake cycles.

Role of Endocrinologists in Diagnosis and Treatment

Endocrinologists are medical professionals who specialize in the diagnosis and treatment of endocrine disorders. These healthcare providers have extensive knowledge of the endocrine system and its intricate workings. When a patient exhibits symptoms of an endocrine disorder or hormonal imbalance, primary care physicians often refer them to an endocrinologist for further evaluation and treatment.

Endocrinologists employ a range of diagnostic tools, including blood tests, imaging studies, and hormone stimulation tests, to assess hormone levels and identify any abnormalities. Based on the diagnosis, they develop personalized treatment plans that may include medication, hormone replacement therapy, lifestyle modifications, or surgical interventions.

Subspecialties in Endocrinology

Endocrinology encompasses various subspecialties, each focusing on specific areas of hormone function and related disorders. These subspecialties allow for a deeper understanding and targeted treatment of complex endocrine conditions. Some notable subspecialties within endocrinology include:

1. Diabetes and Metabolism: Endocrinologists specializing in diabetes and metabolism focus on managing conditions such as type 1 and type 2 diabetes, metabolic syndrome, and obesity.
2. Thyroid Endocrinology: This subspecialty delves into the diagnosis and treatment of thyroid disorders, including hypothyroidism, hyperthyroidism, goiter, and thyroid cancer.
3. Reproductive Endocrinology: Reproductive endocrinologists specialize in addressing hormonal imbalances affecting fertility, menstruation, and reproductive health.
4. Pediatric Endocrinology: Pediatric endocrinologists focus on diagnosing and managing endocrine disorders in children, including growth disorders, puberty-related issues, and congenital hormone deficiencies.
5. Endocrine Oncology: Endocrine oncologists specialize in the treatment of endocrine-related cancers, such as thyroid cancer, adrenal tumors, and neuroendocrine tumors.
6. Neuroendocrinology: This subspecialty explores the intricate relationship between the endocrine system and the nervous system, studying hormone production and regulation in the context of neurological disorders.
7. Gender Affirmation: Endocrinologists specializing in gender affirmation work closely with individuals seeking hormonal therapy as part of their gender transition process.

Seeking Care from an Endocrinologist

If you suspect you have an endocrine disorder or have been referred by your primary healthcare provider, scheduling an appointment with an endocrinologist is crucial. Endocrinologists possess specialized knowledge and expertise in diagnosing and treating a wide range of endocrine conditions. They can provide personalized care, monitor hormone levels, and prescribe appropriate treatments to help manage and improve your condition.

During your visit to an endocrinologist, expect a comprehensive evaluation of your medical history, symptoms, and physical examination. They may order further diagnostic tests to gain a deeper understanding of your hormone levels and overall endocrine function. Based on the findings, the endocrinologist will develop an individualized treatment plan tailored to your specific needs.

In conclusion, endocrinology is a vital field of medicine that sheds light on the intricacies of hormone function and its impact on our health. By seeking care from an endocrinologist, individuals with endocrine disorders can benefit from specialized knowledge, accurate diagnoses, and targeted treatments that aim to restore hormonal balance and improve overall well-being.

Copyright USJOURNALCO 2023

## If Your Looking For A specific Article

It's probably moved, you may need to log into view our free content.

Get Started
